# Supplementary material for: The p75NTR neurotrophin receptor is required to organize the mature neuromuscular synapse by regulating synaptic vesicle availability
Source: PubMed Central journal article supplement (PMC6739937; doi:10.1186/s40478-019-0802-7), 2019-09-12

Additional file 2

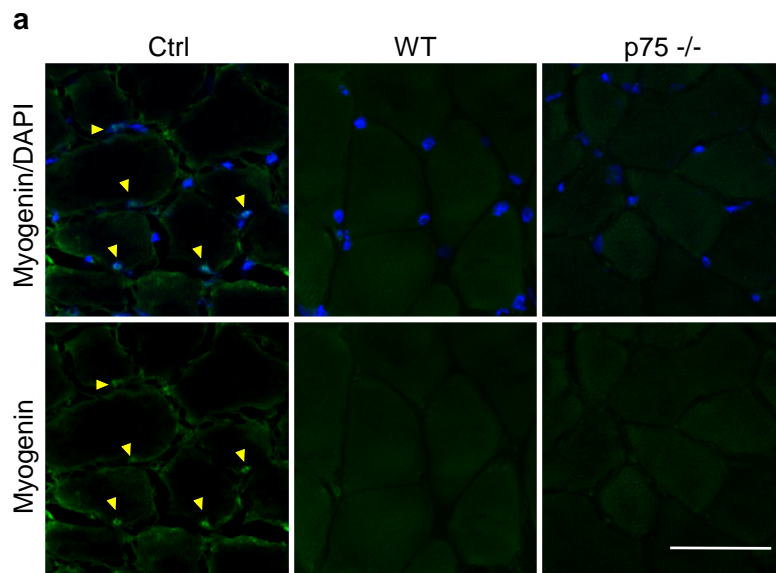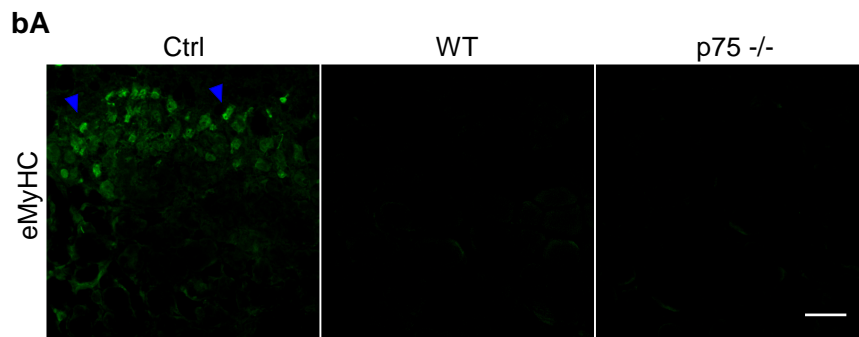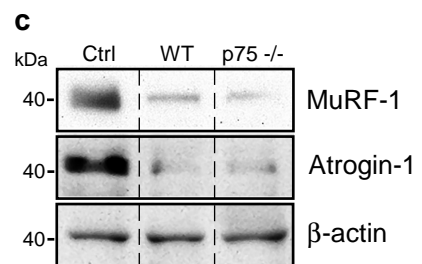

Supplement: 40478_2019_802_MOESM2_ESM.pdf [file 40478_2019_802_MOESM2_ESM.pdf]
