# Supplementary material for: The p75NTR neurotrophin receptor is required to organize the mature neuromuscular synapse by regulating synaptic vesicle availability
Source: Springer Nature journal article supplement (doi:10.1186/s40478-019-0802-7), 2019-09-12

Additional file 3

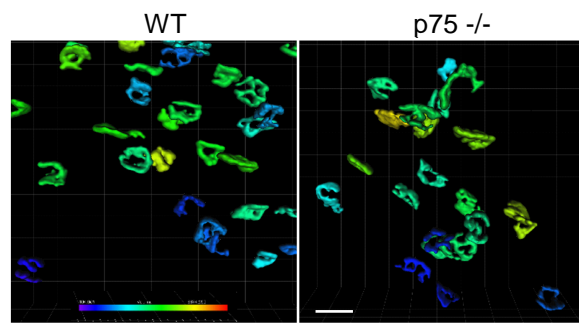

Supplement: MOESM3 [file 25666924]
